# Supplementary material
Source: MDPI journal article supplement (https://www.mdpi.com/2073-4395/12/7/1631)
Supplement: s1 [file s1]

**Supplementary Table S1.** Use-reports and sources of the Lamiaceae taxa used in rural Bulgaria.

| Usage category<br>Taxon                    | Local name              | Use-reports |     |     |      |     |      |      |     | Source (number of use-reports) |                          |                   |                      |                         |
|--------------------------------------------|-------------------------|-------------|-----|-----|------|-----|------|------|-----|--------------------------------|--------------------------|-------------------|----------------------|-------------------------|
|                                            |                         | ORN         | CUL | MED | AROM | REP | POLL | TECH | SYM | Local forms                    | Introduced from the wild | Retail            | Informal exchange    | Collected from the wild |
| <i>Agastache foeniculum</i> (Pursh) Kuntze | lophant                 | 1           | 0   | 2   | 1    | 0   | 1    | 0    | 0   | 0 <sub>a</sub>                 | 0 <sub>a</sub>           | 2 <sub>a</sub>    | 0 <sub>a</sub>       | 0 <sub>a</sub>          |
| <i>Clinopodium dalmaticum</i> L.           | (rodopska) menta        | 0           | 0   | 2   | 0    | 0   | 0    | 0    | 0   | 0 <sub>a</sub>                 | 0 <sub>a, b</sub>        | 0 <sub>a</sub>    | 0 <sub>a, b</sub>    | 2 <sub>b</sub>          |
| <i>Clinopodium vulgare</i> L.              | koteszka stapka         | 0           | 0   | 2   | 0    | 0   | 0    | 0    | 0   | 0 <sub>a</sub>                 | 1 <sub>b, c</sub>        | 0 <sub>a, c</sub> | 0 <sub>a, b, c</sub> | 1 <sub>b</sub>          |
| <i>Lamium galeobdolon</i> (L.) Crantz      | zhalta martva kopriya   | 1           | 0   | 0   | 0    | 0   | 0    | 0    | 0   | 0 <sub>a</sub>                 | 0 <sub>a</sub>           | 1 <sub>a</sub>    | 0 <sub>a</sub>       | 0 <sub>a</sub>          |
| <i>Lavandula angustifolia</i> Mill.        | lavandula               | 9           | 0   | 3   | 4    | 3   | 0    | 0    | 0   | 0 <sub>a</sub>                 | 0 <sub>a, b</sub>        | 9 <sub>b</sub>    | 0 <sub>a, b</sub>    | 0 <sub>a, b</sub>       |
| <i>Marrubium peregrinum</i> L.             | metla                   | 0           | 0   | 0   | 0    | 0   | 0    | 1    | 0   | 0 <sub>a</sub>                 | 0 <sub>a, b</sub>        | 0 <sub>a</sub>    | 0 <sub>a, b</sub>    | 1 <sub>b</sub>          |
| <i>Marrubium vulgare</i> L.                | pchelinok               | 0           | 0   | 1   | 0    | 0   | 0    | 0    | 0   | 0 <sub>a</sub>                 | 1 <sub>b</sub>           | 0 <sub>a, b</sub> | 0 <sub>a, b</sub>    | 0 <sub>a, b</sub>       |
| <i>Melissa officinalis</i> L.              | matochina               | 5           | 1   | 18  | 2    | 0   | 0    | 0    | 0   | 0 <sub>a</sub>                 | 17 <sub>b</sub>          | 0 <sub>a</sub>    | 1 <sub>c</sub>       | 0 <sub>a, c</sub>       |
| <i>Mentha pulegium</i> L.                  | dina menta/ blaskun     | 0           | 0   | 2   | 1    | 0   | 0    | 0    | 0   | 0 <sub>a</sub>                 | 0 <sub>a, b</sub>        | 0 <sub>a</sub>    | 0 <sub>a, b</sub>    | 2 <sub>b</sub>          |
| <i>Mentha spicata</i> L.                   | gyozum/ dzhodzhen       | 37          | 73  | 3   | 3    | 2   | 0    | 0    | 0   | 68 <sub>a</sub>                | 0 <sub>b</sub>           | 2 <sub>b</sub>    | 3 <sub>c</sub>       | 0 <sub>b, c</sub>       |
| <i>Mentha x piperita</i> L.                | menta                   | 12          | 4   | 19  | 0    | 0   | 0    | 0    | 0   | 0 <sub>a</sub>                 | 0 <sub>a, b</sub>        | 17 <sub>c</sub>   | 2 <sub>b, c</sub>    | 0 <sub>a, b</sub>       |
| <i>Ocimum basilicum</i> L.                 | bosilek                 | 11          | 9   | 4   | 16   | 5   | 1    | 0    | 6   | 16 <sub>a</sub>                | 0 <sub>a</sub>           | 10 <sub>a</sub>   | 2 <sub>a</sub>       | 0 <sub>a</sub>          |
| <i>Ocimum minimum</i> L.                   | grutski (greek) bosilek | 4           | 0   | 1   | 2    | 0   | 0    | 0    | 0   | 1 <sub>a</sub>                 | 0 <sub>a, b</sub>        | 1 <sub>a</sub>    | 2 <sub>b</sub>       | 0 <sub>a, b</sub>       |

|                                                               |                                      |    |    |   |   |   |   |   |   |                 |                   |                    |                      |                      |
|---------------------------------------------------------------|--------------------------------------|----|----|---|---|---|---|---|---|-----------------|-------------------|--------------------|----------------------|----------------------|
| <i>Origanum vulgare</i> L.                                    | rigan                                | 0  | 1  | 2 | 0 | 0 | 0 | 0 | 0 | 0 <sub>a</sub>  | 0 <sub>a</sub>    | 0 <sub>a</sub>     | 0 <sub>a</sub>       | 3 <sub>b</sub>       |
| <i>Origanum vulgare</i> subsp.<br><i>hirtum</i> (Link) Ietsw. | byal rigan/<br>(visoka) rigan        | 3  | 18 | 2 | 1 | 1 | 0 | 0 | 0 | 0 <sub>a</sub>  | 5 <sub>b</sub>    | 8 <sub>b</sub>     | 3 <sub>b</sub>       | 2 <sub>b</sub>       |
| <i>Rosmarinus officinalis</i> L.                              | rozmarin                             | 13 | 5  | 6 | 2 | 2 | 0 | 0 | 0 | 0 <sub>a</sub>  | 0 <sub>a, b</sub> | 10 <sub>b, c</sub> | 3 <sub>c</sub>       | 0 <sub>a, b, c</sub> |
| <i>Salvia aethiopis</i> L.                                    | salvia                               | 0  | 0  | 1 | 0 | 0 | 0 | 0 | 0 | 0 <sub>a</sub>  | 0 <sub>a, b</sub> | 0 <sub>a</sub>     | 1 <sub>b</sub>       | 0 <sub>a, b</sub>    |
| <i>Salvia officinalis</i> L.                                  | gradinski chai/<br>(lechebna) salvia | 7  | 0  | 8 | 2 | 0 | 0 | 0 | 0 | 0 <sub>a</sub>  | 0 <sub>a, b</sub> | 8 <sub>b</sub>     | 1 <sub>b</sub>       | 0 <sub>a, b</sub>    |
| <i>Salvia splendens</i> Sellow ex<br>J.A. Schultes            | plamache                             | 1  | 0  | 0 | 0 | 0 | 0 | 0 | 0 | 0 <sub>a</sub>  | 0 <sub>a</sub>    | 1 <sub>a</sub>     | 0 <sub>a</sub>       | 0 <sub>a</sub>       |
| <i>Salvia viridis</i> L.                                      | -                                    | 1  | 0  | 0 | 0 | 0 | 0 | 0 | 0 | 0 <sub>a</sub>  | 0 <sub>a</sub>    | 1 <sub>a</sub>     | 0 <sub>a</sub>       | 0 <sub>a</sub>       |
| <i>Satureja cuneifolia</i> Ten.                               | chai                                 | 0  | 0  | 1 | 0 | 0 | 0 | 0 | 0 | 0 <sub>a</sub>  | 0 <sub>a, b</sub> | 0 <sub>a</sub>     | 0 <sub>a, b</sub>    | 1 <sub>b</sub>       |
| <i>Satureja hortensis</i> L.                                  | (gradinska)<br>chubritsa             | 0  | 56 | 1 | 0 | 0 | 0 | 0 | 0 | 55 <sub>a</sub> | 0 <sub>b</sub>    | 0 <sub>b</sub>     | 0 <sub>b</sub>       | 0 <sub>b</sub>       |
| <i>Satureja pilosa</i> Velen.                                 | niska rigan                          | 0  | 3  | 0 | 0 | 0 | 0 | 0 | 0 | 0 <sub>a</sub>  | 1 <sub>b, c</sub> | 0 <sub>a, c</sub>  | 0 <sub>a, b, c</sub> | 2 <sub>b</sub>       |
| <i>Sideritis scardica</i> Gris.                               | mursalski chai                       | 3  | 0  | 4 | 0 | 0 | 0 | 0 | 0 | 0 <sub>a</sub>  | 1 <sub>b</sub>    | 2 <sub>a, b</sub>  | 1 <sub>b</sub>       | 0 <sub>a, b</sub>    |
| <i>Stachys byzantina</i> K. Koch                              | mecho uho                            | 2  | 0  | 0 | 0 | 0 | 0 | 0 | 0 | 0 <sub>a</sub>  | 0 <sub>a, b</sub> | 1 <sub>a, b</sub>  | 1 <sub>b</sub>       | 0 <sub>a, b</sub>    |
| <i>Thymus</i> sp.                                             | mashterka                            | 1  | 1  | 3 | 0 | 0 | 0 | 0 | 0 | 0 <sub>a</sub>  | 0 <sub>a, b</sub> | 2 <sub>a, b</sub>  | 0 <sub>a, b</sub>    | 1 <sub>b</sub>       |
| <i>Thymus vulgaris</i> L.                                     | mashterka                            | 1  | 4  | 1 | 0 | 0 | 0 | 0 | 0 | 0 <sub>a</sub>  | 0 <sub>a, b</sub> | 4 <sub>b</sub>     | 0 <sub>a, b</sub>    | 0 <sub>a, b</sub>    |

Abbreviations – CUL: culinary herb; ORN: ornamental plant; MED: medicinal plant, incl. herbal teas; AROM: aromatic plant; REP: insect repellent; POLL: pollinator attraction; SYM: symbolic plant used ritually; TECH: technical plant (brooms). Values followed by same letter do not differ significantly from each other at p = 0.05 (Chi-squared test).
